# Supplementary material for: Carbon dots enhanced cold tolerance of lettuce (Lactuca sativa L.): scavenging reactive oxygen species, modulating hormones and up-regulating gene expression
Source: Royal Society of Chemistry journal article supplement (doi:10.1039/d3en00257h), 2023-01-01
Supplement: d3en00257h1.pdf [file d3en00257h1.pdf]

**Carbon dots enhanced cold tolerance of lettuce (*Lactuca sativa* L):  
scavenging reactive oxygen species, modulating hormones and up-  
regulating gene expression**

Bingxu Cheng<sup>ab</sup>, Zicong Ding<sup>ab</sup>, Le Yue<sup>ab</sup>, Feiran Chen<sup>ab</sup>, Xuesong Cao<sup>ab</sup>, Jing Li<sup>ab</sup>,  
Chuanxi Wang<sup>\*ab</sup> and Zhenyu Wang<sup>ab</sup>

<sup>a</sup> Institute of Environmental Processes and Pollution Control, and School of Environment and Civil Engineering, Jiangnan University, Wuxi, Jiangsu, 214122, China

<sup>b</sup> Jiangsu Engineering Laboratory for Biomass Energy and Carbon Reduction Technology, Jiangnan University, Wuxi, Jiangsu, 214122, China

\*Corresponding author:

Email address: [wangcx2018@jiangnan.edu.cn](mailto:wangcx2018@jiangnan.edu.cn) (Dr. Chuanxi Wang)

**Number of pages: 16**

**Number of texts: 5**

**Number of figures: 12**

**Number of tables: 3**

### **Supplementary Text S1: SOD, CAT and MDA testing**

Referring to the previous scheme, follow the steps below to conduct the experiment.<sup>1</sup>  
Preparation of enzyme solution: Fresh lettuce leaves (0.2 g) and 0.05 mol·L<sup>-1</sup> phosphate buffered saline (PBS) (2 ml) at pH 7.8 were mixed together for ice-bath grinding. The mixture was transferred to a centrifuge tube, and centrifuged at 4°C and 12000 g for 20 min. The supernatant in the centrifuge tube was the enzyme solution.

SOD determination: The components of the reaction solution are as follows: 162 ml of 14.5 μM methionine (Met) solution, 0.6 ml of 30 μM EDAT–Na<sub>2</sub> solution, 6 ml of 0.05 mol·L<sup>-1</sup> PBS with pH 7.8, 6 ml of 2.25 mM nitroblue tetra azole (NBT) and 6 ml of 60 μM riboflavin. The above components are mixed to form the reaction solution. 3ml of the reaction solution and 30 μl of the enzyme solution were mixed and reacted under 4000 lux light conditions for 20 min. After the reaction, the absorbance was measured at 560 nm under the dark condition. The determination of SOD needs to prepare two sets of controls. The control group 1 is the maximum photoreduction tube, 3ml of reaction solution and 30 ul of PBS are mixed, and the steps are the same as before. The control group 2 was composed of PBS buffer, and was directly measured for zero adjustment under light-shielded conditions.

CAT determination: The reaction solution is composed of 200 ml of 0.15 mol·L<sup>-1</sup> pH7.0 PBS and 0.3092 ml of 30% H<sub>2</sub>O<sub>2</sub>. The test of CAT activity requires 3 ml of reaction solution and 0.1 ml of enzyme solution, and the absorbance is measured at 240 nm after mixing. Zeroing is done with PBS.

MDA determination: 0.5 g of fresh lettuce leaves and 2 ml of 0.05 mol·L<sup>-1</sup> PBS with pH 7.8 were mixed, ground in an ice bath, centrifuged at 4500 r/min for 10 min, and the supernatant obtained by centrifugation was the MDA extract. Take 2 ml of malondialdehyde extract, add 3ml of trichloroacetic acid containing 0.5% thiobarbituric acid (TBA), heat in a boiling water bath for 10 min, cool down rapidly and centrifuge at 4500 r/min for 10 min, take the supernatant to measure the absorbance. Absorbance was measured at 532 and 600 nm, and distilled water was used as a blank.

### **Supplementary Text S2: Quantitative real-time PCR**

Total RNA was extracted using RNApure Plant Kit (DNase I) (CW BIO, China), and

the extracted RNA was reverse transcribed using EasyQuick RT MasterMix (CW BIO, China) to obtain cDNA. Real-time PCR detection system using CFX 96 Optical Module (BioRad) with UltraSYBR Mixture (CW BIO, China) for quantitative representation of target genes. Details of the reference genes and primers are listed in the Table S3.<sup>3</sup>

### **Supplementary Text S3: HPLC–MS analysis of lettuce leaves**

The supernatant was spun dry and re-dissolved in 200  $\mu$ L of methanol acetonitrile water (4:4:2), and the supernatant was removed by centrifugation at 4 °C and 12000 rpm for 15 min after 30 min of ultrasonication in an ice bath (35 kHz). The supernatant was removed by centrifugation at 4 °C and 12000 rpm for 10 min. Quality control (QC) samples were prepared by mixing aliquots of all samples (15  $\mu$ L of each methanolic extract). Blanks were set to 80% methanol solution. The samples were analyzed by high performance liquid chromatography-tandem mass spectrometry (HPLC–MS, APS8016PLUS, Thermo Scientific, Germany) with reference to the previous method.<sup>4</sup> The test results were analyzed by MetaboAnalyst 5.0.

#### **Parameters set of HPLC-MS**

##### Liquid phase conditions

1) Chromatographic column: HSS T3 column (100\*1.7 mm, particle size 1.8  $\mu$ m, Waters); 2) Column temperature: 35°C; 3) Mobile phase: A = 0.1% formic acid/water; B = 0.1% formic acid/ Acetonitrile; 4) Elution gradient: 0 min 5% B; 1.5 min 5% B; 10 min 100% B; 11 min 100% B; 11.5 min 5% B; 14 min 5% B; 5) Injection volume: 5  $\mu$ L; 6) Flow rate: 0.35 mL/min.

##### Mass spectrometry conditions

1) General: Runtime 0–14 min; Polarity negative/positive; Default charge 1; 2) Full MS: Resolution 70000; AGC target 1e6; Maximum IT 100 ms; Scan range 70–1050 m/z; 3) dd–MS<sup>2</sup> /dd–SIM: Resolution 17500; AGC target 5e4; Maximum IT 50 ms; Loop count 8; TopN 8; Isolation window 1.5 m/z; (N)CE/Stepped nce nce: 20, 40, 60; 4) dd Settings : Minimum AGC target 8e3; Intensity threshold 1.6e5; Exclude isotopes on; Dynamic exclusion 10s.

### **Supplementary Text S4: Preparation and characterization of CDs/protein**

## **complexes**

The extracted protein contents were quantified using Bicinchoninic Acid (BCA) Protein Assay Kit (CW BIO, China). The complex preparation was done by referring to the previous method with slight modifications.<sup>24</sup> The protein solution and the CDs solution were mixed in a 1:1 ratio.

Sodium dodecyl sulfate-polyacrylamide gel electrophoresis (SDS-PAGE) experimental operation is as follows. 100 mL of electrophoresis buffer (10×) was added to 900 mL of pure water for preparing electrophoresis buffer (1×). The configuration of 12% separating gel requires 4.56 mL pure water, 1.36 mL 30% Acrylamide-Bisacrylamide (Acr-Bis, 29:1), 2.0 mL sodium dodecyl sulfate polyacrylamide gel electrophoresis (SDS-PAGE) Stacking Gel Buffer (4×), 0.08 mL 10% ammonium persulfate (APS) and 0.008 mL N, N, N', N'-Tetramethylethylenediamine (TEMED), 5%. The configuration of the stacking gel requires 5.25 mL of pure water, 6.0 mL of 30% Acr-Bis (29:1), 3.75 mL of SDS-PAGE Separating Gel Buffer (4×), 0.15 mL of 10% APS and 0.006 mL of TEMED. The release gel is poured into the mold, and a small amount of pure water is used for sealing. Once the separating gel is polymerized, the pure water is removed, the stacking gel is poured into the mold and the comb is inserted. After the stacking gel polymerized, the comb was carefully removed. The electrophoresis sample preparation procedure is as follows. First, a sample solution containing 50 mg of protein is required to be prepared; Next, the loading buffer was added to the sample, and the mixture was reacted at 100 °C for 5 minutes; Finally, the mixture was centrifuged, and the supernatant was added to the sample well for electrophoresis. After the end, it was stained with Coomassie brilliant blue and imaged with a gel electrophoresis imager (BIO-RAD, Gel Doc XR+ and ChemicDoc XRS+ Imaging System, Version 6.0).

The TEM sample was prepared by the solution dispersion-dropping method, and the protein/CDs complex prepared in advance was ultrasonicated for 30 minutes in ice water and dropped on the copper grid (T10023, TILD), then used Talos F200X G2 electron microscope (FEI, USA) after drying to acquire a TEM image. The circular dichroism spectrum test was carried out according to the following steps. 5 mL of 0.5

mg·mL<sup>-1</sup> protein and 5 mL of protein/CDs complex were used for this test, and 5 mL of blank solvent was used as a control. The sample was installed in a 1 mm quartz tube, and the circular dichroism spectrometer (J815, JASCO, Japan) with a scanning speed of 50 nm·min<sup>-1</sup> was used to complete the test. To obtain accurate data, circular dichroism spectroscopy was performed at least three times. The isothermal titration calorimeter (ITC, TA, the United States) test is as follows. 2 mL of 1 mg·mL<sup>-1</sup> CDs solution and 2 mL of 1 mg·mL<sup>-1</sup> protein solution was used as the test sample solution, and the test mode was that CDs were dropped into the protein solution. The initial volume of CDs titration was 50 µL, and the starting volume of the protein was 350 µL. There are 25 drops of experiments, 2.02 µL per drop, 180 s interval, temperature of 25 °C, stirring speed 350 rpm·min<sup>-1</sup>, temperature of 25 °C, and CDs drip onto protein extract solution as a blank control. X-ray photoelectron spectrometer (XPS, Nexsa, Thermo Kalpha, USA) characterization were conducted by scientific compass test service platform.

#### **Supplementary Text S5. Economic implication**

Generally, lettuce is planted at a density of about  $7.5 \times 10^4$  plants per hectare. The cost of CDs is \$0.07/g and the total dosage of each plant in the full life cycle is 0.125 mg based on the best performance concentration (5 mg·L<sup>-1</sup>). Thus, the additional cost of applying CDs to lettuce may be \$2.81 per hectare. A total yield of lettuce can be calculated about 30 t/hectare. Cold could cause 25% of the production loss, and economic losses can be up to  $\$4.6 \times 10^3$  per hectare. It is predicted that the application of CDs could decrease lettuce yield loss to 20%, and the economic loss will be reduced by approximately  $\$0.9 \times 10^3$  (the potential labor cost was not considered for CDs application).

**Table S1.** Significance of lettuce leaf metabolites in Non-CK and CDs under cold stress.

| Classification                      | Name                        | Non-CK/CK |       | CDs/CK |       |
|-------------------------------------|-----------------------------|-----------|-------|--------|-------|
|                                     |                             | FC        | VIP   | FC     | VIP   |
| Organic acids and their derivatives | Acrylic acid                | 1.042     | 0.023 | 0.647  | 1.259 |
|                                     | Asparagine                  | 6.594     | 1.999 | 8.915  | 1.498 |
|                                     | Chicoric acid               | 0.523     | 1.481 | 0.550  | 1.086 |
|                                     | D-(-)-Glutamine             | 2.381     | 1.750 | 2.906  | 1.372 |
|                                     | D-(+)-Proline               | 1.615     | 1.376 | 1.646  | 1.434 |
|                                     | DL-Arginine                 | 2.236     | 1.427 | 1.914  | 1.262 |
|                                     | DL-Glutamine                | 2.736     | 1.527 | 3.312  | 1.431 |
|                                     | DL-Lactic Acid              | 0.741     | 0.890 | 1.948  | 1.202 |
|                                     | DL-Malic acid               | 0.817     | 0.623 | 1.375  | 0.914 |
|                                     | DL-Norleucine               | 2.385     | 1.836 | 1.473  | 1.292 |
|                                     | Fumaric acid                | 0.930     | 0.381 | 1.484  | 1.116 |
|                                     | Jasmonic acid               | 1.505     | 1.029 | 2.958  | 1.448 |
|                                     | L-Aspartic acid             | 1.441     | 0.799 | 2.420  | 1.419 |
|                                     | L-Glutamic acid             | 1.367     | 0.731 | 1.875  | 1.430 |
|                                     | L-Phenylalanine             | 2.112     | 1.812 | 1.673  | 1.487 |
|                                     | L-Pyroglutamic acid         | 1.915     | 1.543 | 2.134  | 1.319 |
|                                     | L-Threonine                 | 2.308     | 1.663 | 2.648  | 1.458 |
|                                     | Malonic acid                | 0.616     | 0.942 | 1.345  | 0.882 |
|                                     | Methylmalonic acid          | 1.019     | 0.144 | 0.601  | 1.452 |
|                                     | N-Acetyl-DL-glutamic acid   | 1.438     | 0.898 | 3.369  | 1.461 |
|                                     | N-Acetyl-L-phenylalanine    | 0.963     | 0.355 | 0.802  | 1.166 |
|                                     | Pipecolic acid              | 1.848     | 1.395 | 0.563  | 1.427 |
|                                     | Prolylleucine               | 0.738     | 0.934 | 0.831  | 1.165 |
| Salicylic acid                      | 2.175                       | 1.360     | 2.418 | 1.161  |       |
| Valine                              | 2.157                       | 1.749     | 1.599 | 1.301  |       |
| Lipids and lipidoid molecules       | (±)9-HpODE                  | 0.923     | 0.579 | 0.421  | 1.426 |
|                                     | 12-Oxo phytodienoic acid    | 0.867     | 0.673 | 0.304  | 1.417 |
|                                     | 16-Hydroxyhexadecanoic acid | 1.403     | 1.232 | 0.296  | 1.490 |
|                                     | 1-Linoleoyl glycerol        | 0.534     | 1.756 | 0.765  | 0.894 |
|                                     | 2-Hydroxycaproic acid       | 1.345     | 1.108 | 1.209  | 1.099 |
|                                     | 2-Isopropylmalic acid       | 1.243     | 0.653 | 1.354  | 1.248 |
|                                     | 3-Methyladipic acid         | 1.079     | 0.145 | 0.744  | 1.434 |
|                                     | 9-HOTE                      | 1.122     | 0.228 | 0.243  | 1.487 |
|                                     | 9-Oxo-ODE                   | 0.561     | 1.601 | 0.559  | 1.305 |
|                                     | Carvone                     | 0.982     | 0.206 | 0.747  | 0.908 |
|                                     | Citral                      | 0.494     | 1.638 | 0.462  | 1.224 |
|                                     | Corchorifatty acid F        | 0.770     | 1.088 | 0.301  | 1.502 |
|                                     | Cuminaldehyde               | 0.750     | 1.153 | 0.783  | 1.249 |
|                                     | Cynaroside                  | 1.210     | 0.709 | 1.234  | 1.032 |
|                                     | D,L-Camphor                 | 0.718     | 1.128 | 0.716  | 1.288 |

|                                 |                                    |       |       |       |       |
|---------------------------------|------------------------------------|-------|-------|-------|-------|
|                                 | Dihydroroseoside                   | 0.765 | 1.080 | 0.828 | 1.023 |
|                                 | Mesterolone                        | 1.043 | 0.040 | 0.287 | 1.497 |
|                                 | Neochlorogenic acid                | 0.927 | 0.528 | 0.471 | 1.448 |
| Phenylpropanes and polyketides  | 7-Hydroxycoumarine                 | 0.633 | 1.511 | 0.657 | 1.053 |
|                                 | Chalcone                           | 0.630 | 1.487 | 0.058 | 1.536 |
|                                 | Eriodictyol                        | 0.267 | 1.977 | 0.534 | 1.393 |
|                                 | Esculin                            | 0.729 | 1.225 | 0.800 | 1.108 |
|                                 | Flavanone                          | 0.606 | 1.124 | 0.022 | 1.491 |
|                                 | Miquelianin                        | 0.743 | 1.323 | 0.792 | 1.189 |
|                                 | Naringenin                         | 0.627 | 1.455 | 0.654 | 1.252 |
|                                 | Nictoflorin                        | 0.585 | 1.613 | 0.651 | 1.350 |
|                                 | Phloretin                          | 0.482 | 1.802 | 0.526 | 1.404 |
|                                 | Quercetin                          | 0.658 | 1.514 | 0.739 | 1.175 |
|                                 | Quercetin-3 $\beta$ -D-glucoside   | 0.677 | 1.264 | 0.678 | 0.934 |
| Organic heterocyclic compounds  | 2-Methoxy-9H-xanthen-9-one         | 0.799 | 1.159 | 0.049 | 1.522 |
|                                 | Adenine                            | 0.979 | 0.310 | 0.650 | 1.226 |
|                                 | Caffeine                           | 1.018 | 0.323 | 1.144 | 0.872 |
|                                 | DL-Tryptophan                      | 1.260 | 0.803 | 0.596 | 1.310 |
|                                 | Indole-3-acrylic acid              | 1.227 | 0.714 | 0.597 | 1.314 |
|                                 | Oxepanone                          | 0.851 | 0.631 | 0.291 | 1.463 |
|                                 | Pyraclostrobin                     | 0.068 | 2.034 | 0.076 | 1.526 |
|                                 | Sedanolid                          | 0.688 | 1.310 | 0.430 | 1.465 |
|                                 | $\beta$ -Lapachone                 | 0.665 | 1.238 | 0.024 | 1.554 |
| Organic oxygen compounds        | 4,5-Dicaffeoylquinic acid          | 0.923 | 0.563 | 0.390 | 1.479 |
|                                 | Apocynin                           | 1.065 | 0.173 | 0.820 | 1.017 |
|                                 | L-(+)-Tartaric acid                | 0.659 | 1.478 | 0.873 | 0.932 |
|                                 | Sucrose                            | 0.662 | 1.253 | 1.210 | 1.140 |
|                                 | Triethylene glycol monobutyl ether | 8.561 | 0.904 | 3.776 | 1.161 |
|                                 | $\alpha,\alpha$ -Trehalose         | 0.462 | 1.664 | 1.174 | 1.263 |
| Benzenes                        | 1-Naphthol                         | 0.467 | 1.751 | 0.749 | 0.900 |
|                                 | 2,4-Dihydroxybenzoic acid          | 0.533 | 1.686 | 0.080 | 1.556 |
|                                 | 2,5-di-tert-Butylhydroquinone      | 0.976 | 0.136 | 3.354 | 1.091 |
|                                 | 2-Naphthalenesulfonic acid         | 1.003 | 0.053 | 1.392 | 1.077 |
|                                 | Eugenol                            | 1.909 | 1.609 | 0.336 | 1.471 |
|                                 | Syringic acid                      | 1.580 | 1.226 | 0.576 | 1.082 |
| Organic nitrogen compounds      | 2-Amino-1,3,4-octadecanetriol      | 0.911 | 0.701 | 0.807 | 1.172 |
|                                 | 2-Amino-1,3-octadecanediol         | 0.971 | 0.248 | 1.259 | 1.168 |
|                                 | Imidacloprid                       | 0.918 | 0.075 | 0.339 | 1.077 |
|                                 | Oleoyl ethylamide                  | 0.770 | 1.400 | 1.536 | 0.935 |
|                                 | $\alpha$ -Linolenoyl ethanolamide  | 3.348 | 1.507 | 0.356 | 1.453 |
| Alkaloids and their derivatives | Hydromorphone                      | 1.005 | 0.148 | 0.075 | 1.550 |
|                                 | Trigonelline                       | 1.164 | 0.189 | 1.655 | 1.220 |
| Nucleosides, nucleotides and    | Uridine 5'-diphosphogalactose      | 1.987 | 1.373 | 2.217 | 1.383 |
|                                 | Xanthosine                         | 3.123 | 1.710 | 0.434 | 1.367 |

| analogs |                                                                                                                                                    |       |       |       |       |
|---------|----------------------------------------------------------------------------------------------------------------------------------------------------|-------|-------|-------|-------|
|         | 13,14-dihydro-15-keto-tetranor Prostaglandin F1?                                                                                                   | 1.995 | 1.423 | 0.062 | 1.547 |
|         | 1-Palmitoylglycerol                                                                                                                                | 0.924 | 0.523 | 1.161 | 0.896 |
|         | 1-Tetradecylamine                                                                                                                                  | 0.951 | 0.368 | 1.190 | 0.983 |
|         | 2-(3,4-dihydroxyphenyl)-5,7-dihydroxy-3,4-dihydro-2H-1-benzopyran-4-one                                                                            | 0.276 | 1.985 | 0.512 | 1.500 |
|         | 2-(3,4-Dihydroxyphenyl)-5-hydroxy-4-oxo-4H-chromen-7-yl 6-O-(6-deoxy-alpha-L-mannopyranosyl)-beta-D-glucopyranoside                                | 0.503 | 1.572 | 0.592 | 1.462 |
|         | 2-(hydroxymethyl)-6-[(E)-4-(1,2,4-trihydroxy-2,6,6-trimethylcyclohexyl)but-3-en-2-yl]oxyoxane-3,4,5-triol                                          | 0.759 | 1.262 | 0.663 | 1.438 |
|         | 2-[3,8-Dihydroxy-8-(hydroxymethyl)-3-methyl-2-oxodecahydro-5-azulenyl]-2-propanyl hexopyranoside                                                   | 1.120 | 0.325 | 0.181 | 1.542 |
|         | 3-(4-Methylbenzoyl)acrylic acid                                                                                                                    | 0.518 | 1.703 | 0.767 | 0.985 |
|         | 3-[3-(beta-D-Glucopyranosyloxy)-2-hydroxyphenyl]propanoic acid                                                                                     | 0.552 | 1.573 | 0.641 | 1.310 |
|         | 3-{{[(2R,3S,4S,5R,6S)-6-{{[2-(3,4-dihydroxyphenyl)-5,7-dihydroxy-4-oxo-4H-chromen-3-yl]oxy}-3,4,5-trihydroxyoxan-2-yl]methoxy}-3-oxopropanoic acid | 0.713 | 1.487 | 0.785 | 1.203 |
|         | 4,4'-Bis(diethylamino)benzophenone                                                                                                                 | 1.129 | 0.420 | 0.203 | 1.217 |
|         | 4-methoxy-6-(prop-2-en-1-yl)-2H-1,3-benzodioxole                                                                                                   | 0.798 | 0.796 | 0.572 | 1.292 |
|         | 4-methoxy-6-[2-(4-methoxyphenyl)ethyl]-2H-pyran-2-one                                                                                              | 0.967 | 0.283 | 0.535 | 1.430 |
| Others  | 5-(4-Carboxy-3-methylbutyl)-1,4a-dimethyl-6-methylenedecaahydro-1-naphthalenecarboxylic acid                                                       | 0.995 | 0.271 | 0.045 | 1.549 |
|         | 5-(6-hydroxy-6-methyloctyl)-2,5-dihydrofuran-2-one                                                                                                 | 0.859 | 0.783 | 0.826 | 0.892 |
|         | 5-(sec-butyl)-2-hydroxybenzaldehyde N-phenylhydrazone                                                                                              | 1.019 | 0.062 | 0.305 | 1.175 |
|         | 9-Oxo-10(E),12(E)-octadecadienoic acid                                                                                                             | 0.770 | 1.637 | 0.451 | 1.528 |
|         | Ageratriol                                                                                                                                         | 1.289 | 0.439 | 0.605 | 1.022 |
|         | Cyclopentylacetic acid                                                                                                                             | 0.775 | 1.146 | 0.196 | 1.554 |
|         | Ethyl violet                                                                                                                                       | 2.816 | 0.781 | 0.434 | 1.065 |
|         | Glycerophospho-N-palmitoyl ethanolamine                                                                                                            | 1.365 | 0.752 | 0.485 | 1.473 |
|         | Luvanetin                                                                                                                                          | 0.699 | 1.171 | 0.057 | 1.537 |
|         | methyl 4-methyl-2-oxo-2H-pyran-6-carboxylate                                                                                                       | 0.866 | 0.559 | 0.287 | 1.496 |
|         | Michler's ketone                                                                                                                                   | 1.626 | 0.735 | 0.220 | 1.227 |
|         | N-(9-oxodecyl)acetamide                                                                                                                            | 1.281 | 0.475 | 3.071 | 1.532 |
|         | N,N'-Diphenylguanidine                                                                                                                             | 1.938 | 0.876 | 1.592 | 1.245 |
|         | N-Methyldioctylamine                                                                                                                               | 1.600 | 0.445 | 1.239 | 1.161 |
|         | n-Pentyl isopentyl phthalate                                                                                                                       | 1.247 | 0.208 | 0.426 | 1.317 |
|         | Shogaol                                                                                                                                            | 1.735 | 1.257 | 0.745 | 1.148 |
|         | Sorbicillin                                                                                                                                        | 0.875 | 0.702 | 0.831 | 0.975 |
|         | YNH                                                                                                                                                | 1.069 | 0.109 | 0.171 | 1.520 |
|         | $\alpha$ -Lapachone                                                                                                                                | 0.792 | 0.880 | 0.125 | 1.535 |

FC: fold change

Non-CK/CK: Changes in natural growth state compared to cold stress

CDs/CK: Changes after application of CDs compared to cold stress



**Table S2.** Thermodynamic parameters of CDs and protein binding

|        | $\Delta H$ (kJ·mol <sup>-1</sup> ) | $\Delta S$ (J·(mol·K) <sup>-1</sup> ) |
|--------|------------------------------------|---------------------------------------|
| Site 1 | -273.6                             | -898.5                                |
| Site 2 | 2718                               | 913.7                                 |

**Table S3.** Primer names and sequences used for qRT-PCR

| Primer name | Sequences (5' to 3')        |
|-------------|-----------------------------|
| CBF 8-F     | CATGTCGTAGCAAAGCTCAGTCTTG   |
| CBF 8-R     | TTTCGTGAAGCCAACATCACTTCGG   |
| CBF 12-F    | TTGCAGCACAACCTCTGTCTTGAATG' |
| CBF 12-R    | TCCCCTGTACACCGGATGTCTAGTCT  |
| Cor 413-F   | TGTTTCGTCGCTCGCTCAC         |
| Cor 413-R   | ACCCTCGTTTCCATTCTGC         |

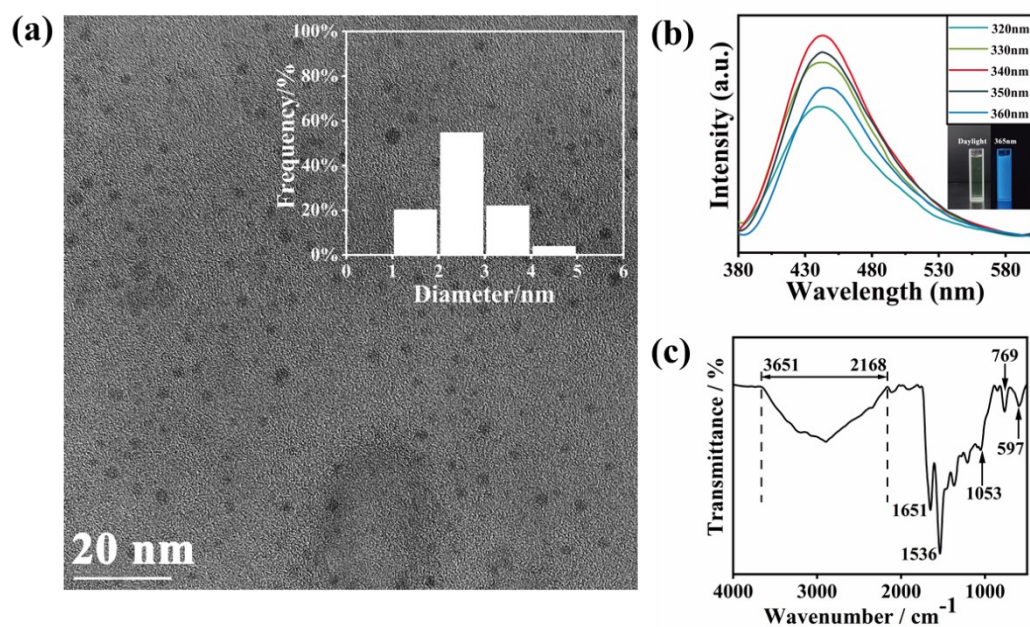**Fig. S1.** Characterization of CDs. (a) TEM image of CDs. (b) PL spectra of CDs. (c) FTIR spectrum of CDs.

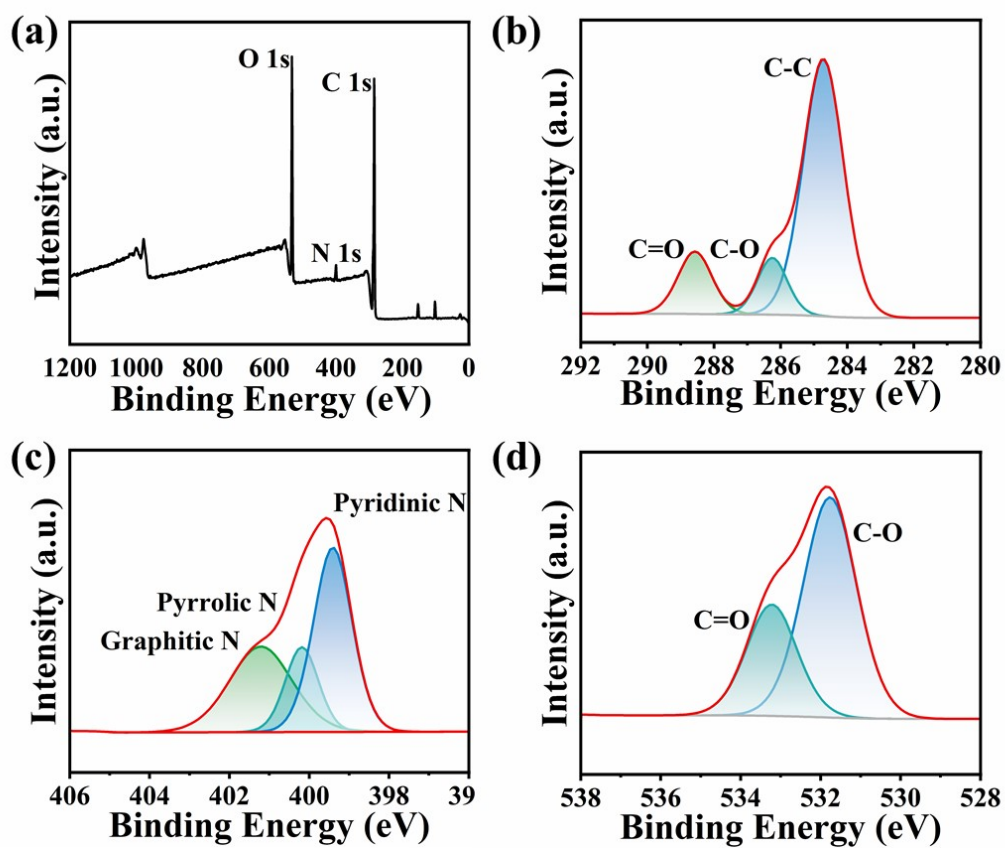

**Fig. S2.** XPS spectra of CDs. (a) XPS full spectrum of CDs. (b) High-resolution C 1s XPS spectrum. (c) High-resolution N 1s XPS spectrum. (d) High-resolution O 1s XPS spectrum.

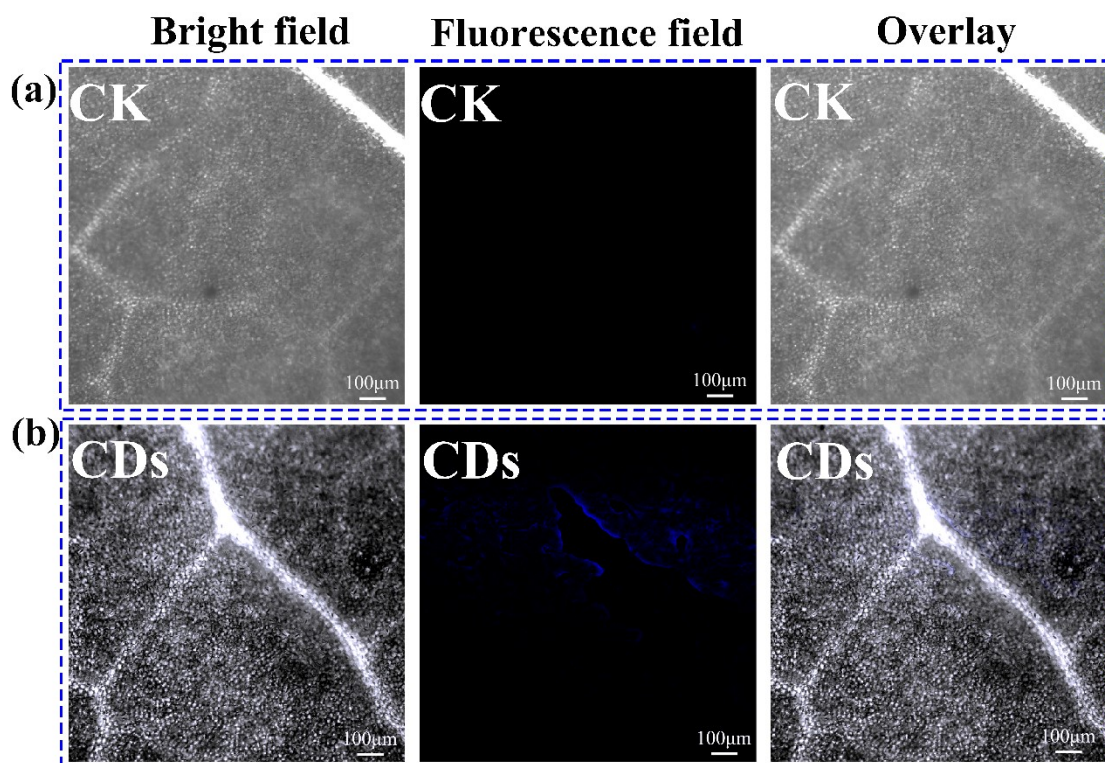

**Fig. S3.** Confocal images of CDs in lettuce leaves. (a) CK, under natural growth conditions; (b) CDs, observed after spraying CDs.

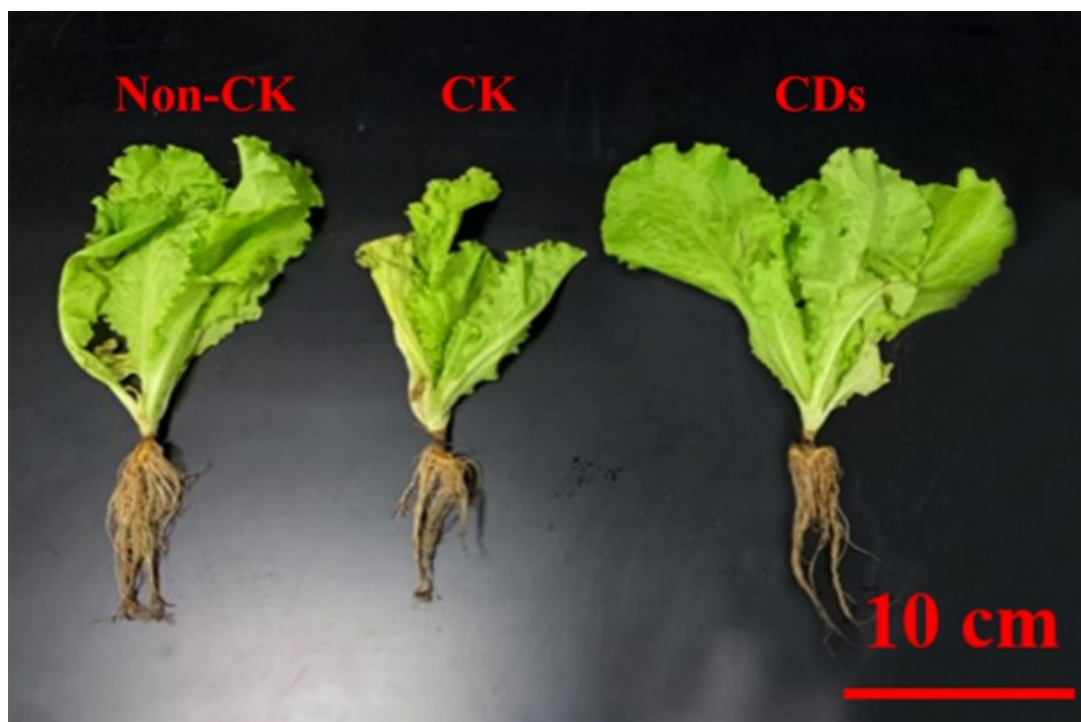

**Fig. S4.** Photos of lettuce. The lettuce was collected and photographed on the 56<sup>th</sup> day. The Non-CK group was not treated, and it was grown naturally; the CK group was naturally grown to the 55<sup>th</sup> day, and placed in an environment at 4°C for 12 hours; the

CDs group were sprayed CDs continuously for 5 days, and placed in a 4°C environment for 12 hours.

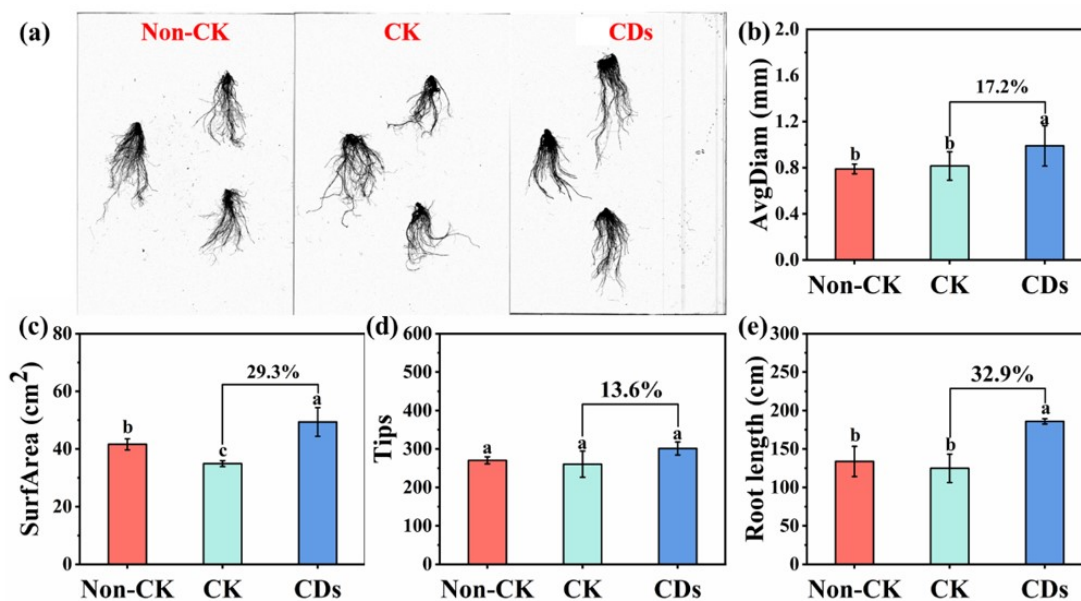

**Fig. S5.** Photos and parameters of lettuce root. (a) Photo of the root effect of lettuce. (b) Average root diameter of lettuce roots. (c) The surface area of the lettuce root. (d) Number of root tips of lettuce roots. (e) Root length of lettuce root.

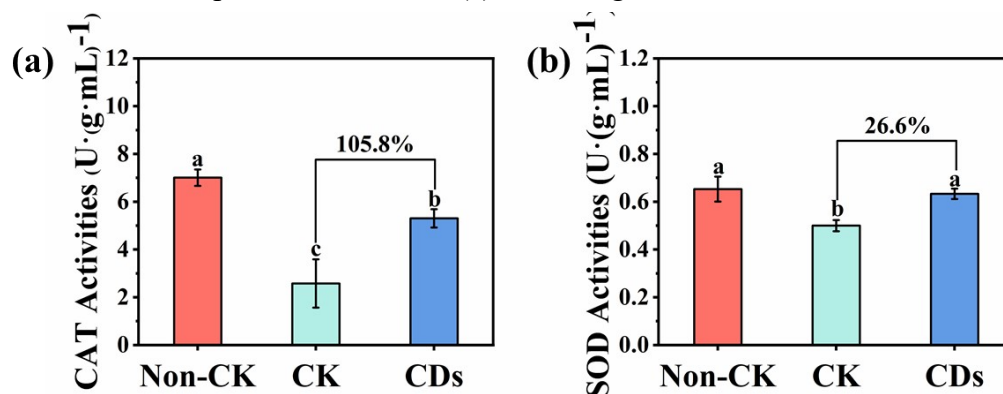

**Fig. S6.** Enzyme activity of antioxidant system in lettuce leaves. (a) CAT activity. (b) SOD enzyme activity. ( $p < 0.05$ ).

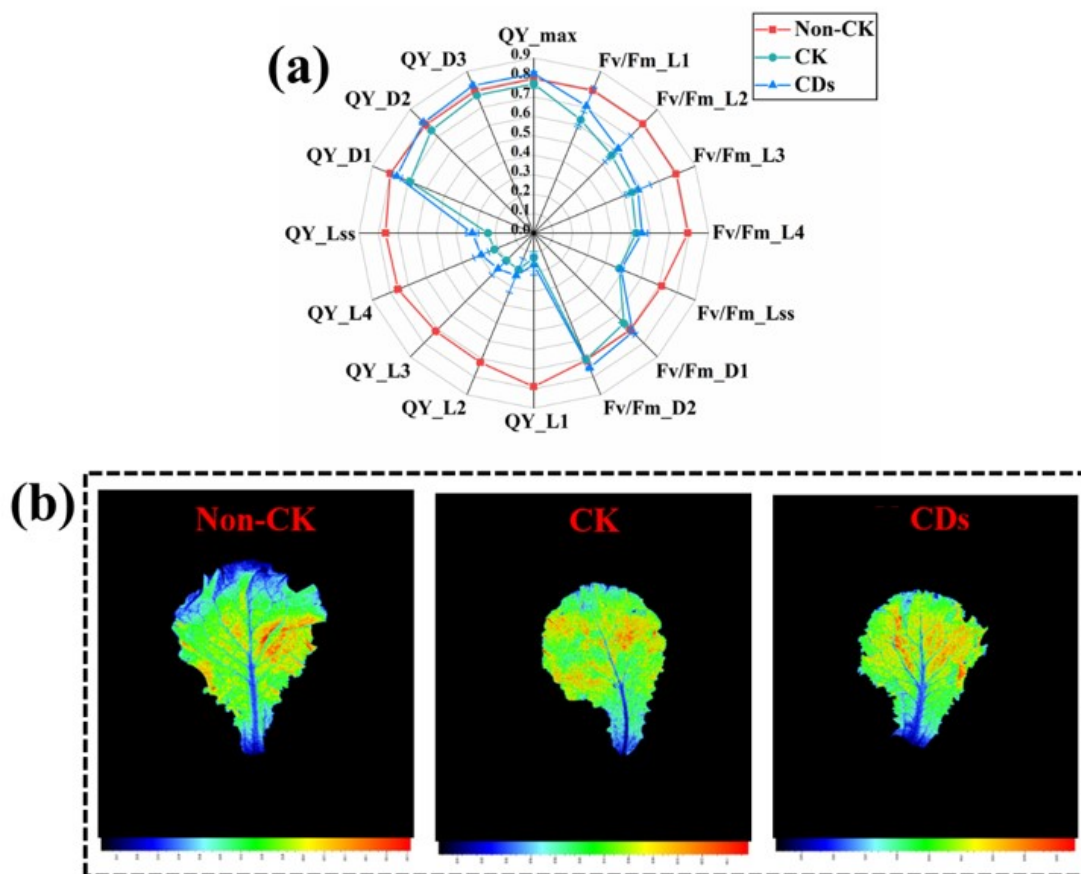

**Fig. S7.** Chlorophyll fluorescence parameters and effect photos of lettuce. (a) Chlorophyll fluorescence parameters; (b) Chlorophyll fluorescence image.

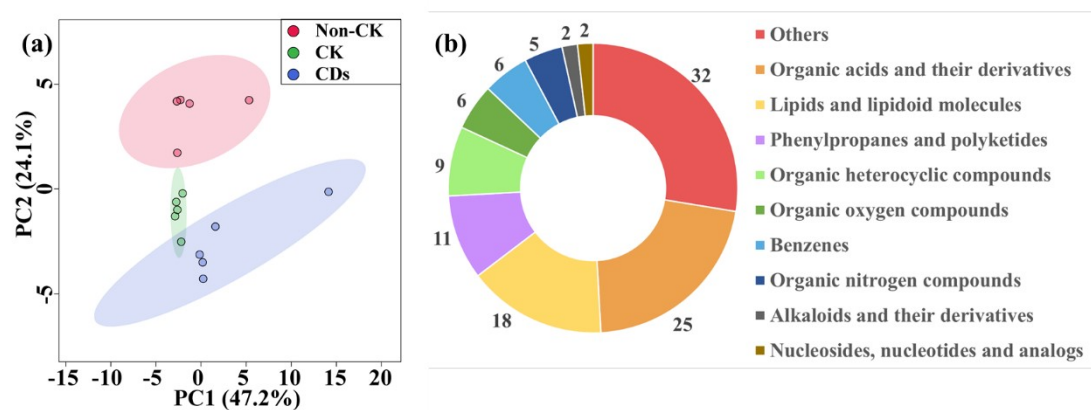

**Fig. S8.** CDs regulate the metabolism of lettuce leaves. (a) Principal component analysis (PCA) diagrams of metabolites in lettuce leaves in different groups (Non-CK, CK and 5 mg·kg<sup>-1</sup> CDs). (b) Classification of significantly different metabolites in lettuce leaves.

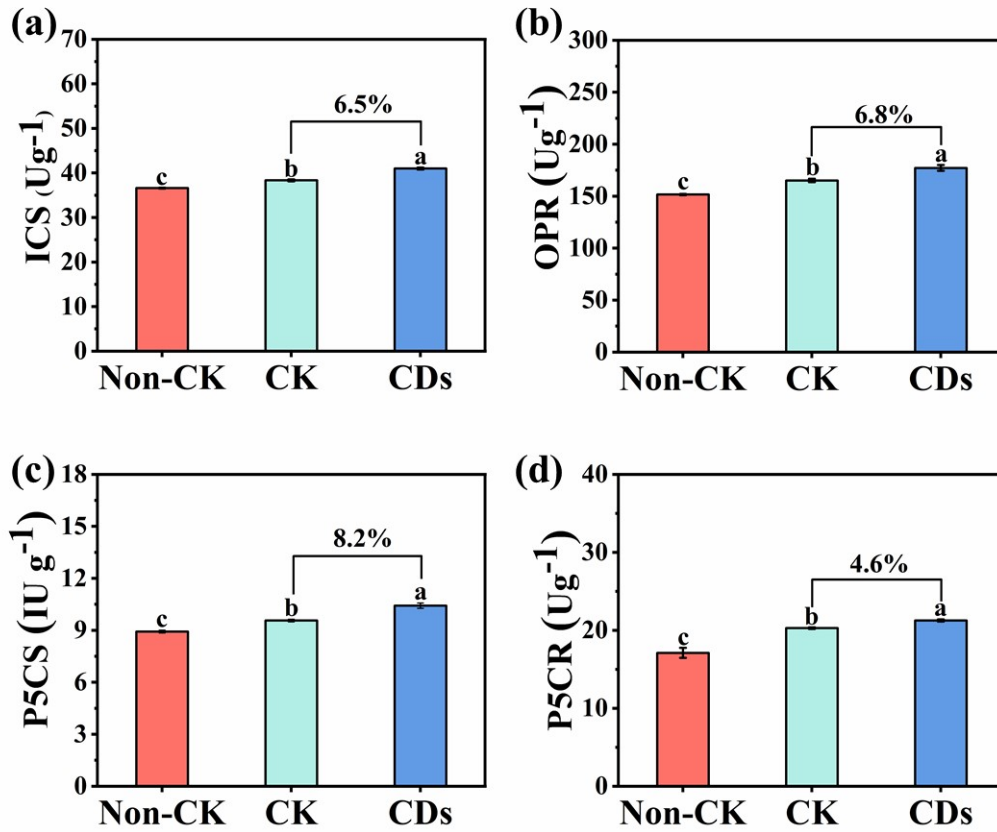

**Fig. S9.** Rate-limiting enzyme activity of related metabolites. (a) Rate-limiting enzyme activity of salicylic acid synthesis; (b) rate-limiting enzyme activity of jasmonic acid synthesis; (c) and (d) rate-limiting enzyme activity of proline synthesis.

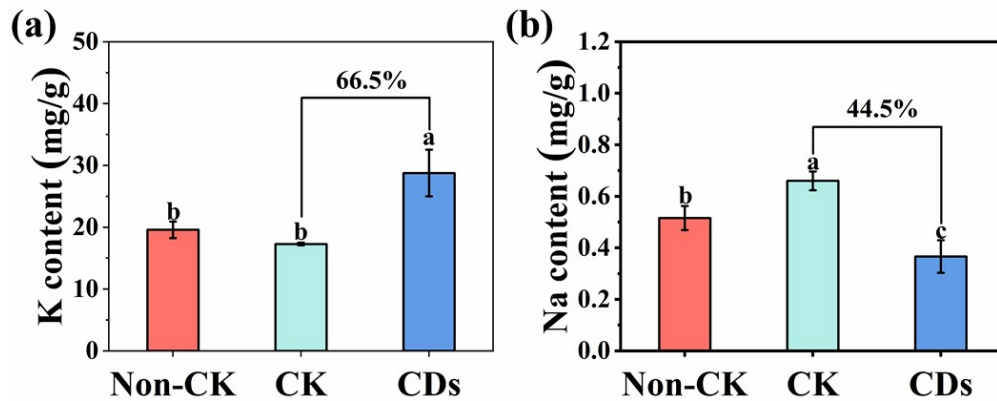

**Fig. S10.** Maintaining osmotic balance in lettuce cells. (a)  $\text{K}^+$  content in lettuce cells. (b)  $\text{Na}^+$  content in lettuce cells.

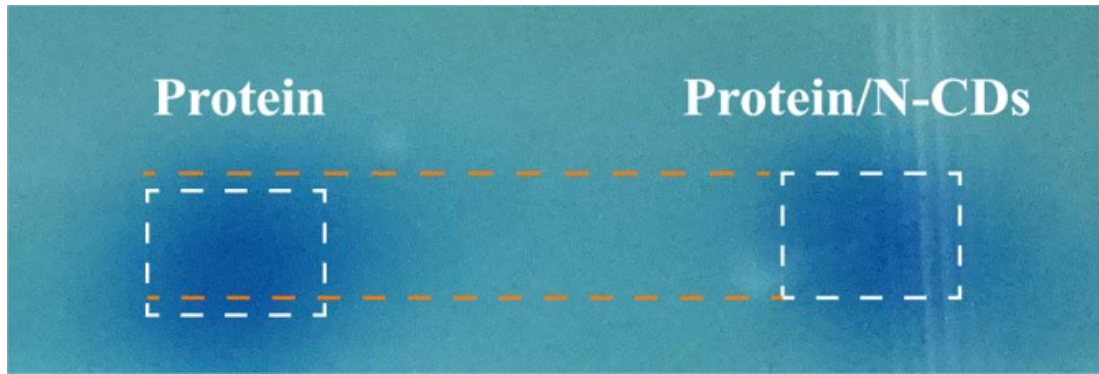

**Fig. S11.** SDS-PAGE images of proteins, CDs/proteins. The framed area represents the region of major movement during electrophoresis.

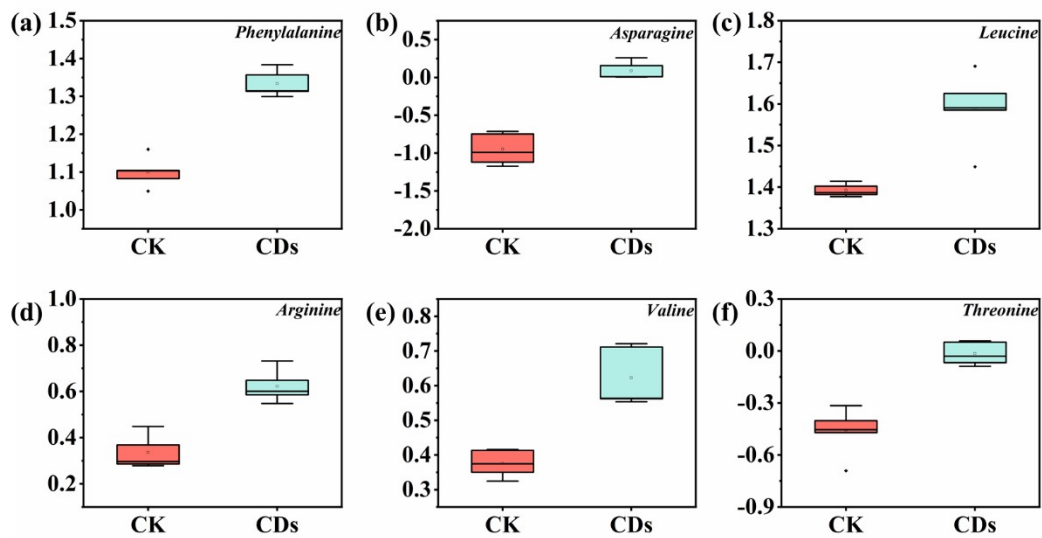

**Fig. S12.** Spraying CDs changes the contents of related amino acids in lettuce leaves. (a)-(f) are phenylalanine, asparagine, leucine, threonine, valine, and arginine, respectively.

## References

- (1) Y. Chong, C. Ge, Z. Yang, J. A. Garate, Z. Gu, J. K. Weber, J. Liu, R. Zhou, Reduced cytotoxicity of graphene nanosheets mediated by blood-protein coating. *ACS Nano*, 2015, 9, 5713-5724. DOI: <https://doi.org/10.1021/nn5066606>.
- (2) Y. Shen, J. Li, S. Zhang, X. Jiang, J. Liang, T. Li, R. Guo, W. Guan, L. Yang, Cd stress alleviation in mung-bean seedlings with biogenic hydroxyapatite nanoparticles as ecofriendly remediation agents. *Environ. Sci.: Nano*, 2022, 9, 3844-3858, 10.1039/D2EN00536K. DOI: 10.1039/D2EN00536K.
- (3) Y. Han, Y. Yu, J. Zhou, G. K. Jaganathan, M. Shen, Q. Zhou, D. Song, B. Liu, Parthenolide reduces the freezing tolerance of hydrated lettuce seeds by inhibiting the proteolysis of seed storage globulins. *Plant Cell, Tissue and Organ Culture (PCTOC)*, 2021, 144, 247-259. DOI: 10.1007/s11240-020-01836-z.
- (4) L. Tian, J. Shen, G. Sun, B. Wang, R. Ji, L. Zhao, Foliar application of SiO<sub>2</sub> nanoparticles alters soil metabolite profiles and microbial community composition in the Pakchoi (*Brassica chinensis* L.) rhizosphere grown in contaminated mine soil. *Environ. Sci. Technol.*, 2020, 54, 13137-13146. DOI: 10.1021/acs.est.0c03767.
